# Physical Activity Status, But Not Age, Influences Inflammatory Biomarkers and Toll-Like Receptor 4

Brian K. McFarlin,<sup>1</sup> Michael G. Flynn,<sup>2</sup> Wayne W. Campbell,<sup>3</sup> Bruce A. Craig,<sup>4</sup> J. Paul Robinson,<sup>5</sup>  
Laura K. Stewart,<sup>2</sup> Kyle L. Timmerman,<sup>2</sup> and Paul M. Coen<sup>2</sup>

<sup>1</sup>Department of Health and Human Performance, University of Houston, Texas.

<sup>2</sup>Wastl Human Performance Laboratory, Department of Health and Kinesiology,

<sup>3</sup>Department of Foods and Nutrition, <sup>4</sup>Department of Statistics, and

<sup>5</sup>Bindley Biosciences Center, Basic Medical Sciences, Purdue University, West Lafayette, Indiana.

**Background.** Chronic inflammation has been implicated in the development of cardiovascular disease, diabetes mellitus, cachexia, and osteoporosis. Regular physical activity has been purported to possess “anti-inflammatory” properties which may limit chronic inflammation. Recently, we hypothesized that toll-like receptor 4 (TLR4) may play a role in activity-induced modulation of inflammation. Therefore, the purpose of this study was to determine the association between age, physical activity status, biomarkers of inflammation, and TLR4.

**Methods.** Male and female participants ( $n = 84$ ) were recruited to fill one of the following groups: young (18–30 years), active; young, inactive; old (60–80 years), active; or old, inactive. To assess physical activity status, participants completed a Paffenbarger Physical Activity Questionnaire and a modified Balke submaximal treadmill test. After grouping and screening, participants were given a standard mixed diet to consume 24 hours prior to arriving at the laboratory. Participants were instructed to consume all food by 10 PM the night prior to blood sampling (8-hour fast). Following 30 minutes of seated rest in a quiet room, venous blood samples were collected. Lipopolysaccharide-stimulated inflammatory cytokine production and plasma high-sensitivity C-reactive protein (hsCRP) were determined by enzyme-linked immunosorbent assay, and TLR4 expression was determined by flow cytometry.

**Results.** Lipopolysaccharide-stimulated interleukin-6, interleukin-1 $\beta$ , and tumor necrosis factor- $\alpha$  production, TLR4 expression, and hsCRP were significantly lower in active compared to inactive participants ( $p < .05$ ). Also, older participants had significantly higher hsCRP than young participants had ( $p < .05$ ).

**Conclusions.** The findings of the present study support previous reports which infer that acute exercise or a physically active lifestyle may possess anti-inflammatory properties. Also this study, along with previous work from our laboratory, suggests that TLR4 may play a role in regulating the link between inflammatory cytokine production and a physically active lifestyle.

CHRONIC inflammation has been implicated in the development of osteoporosis, diabetes mellitus, cachexia, and cardiovascular disease (1,2). A physically active lifestyle has been reported to exert anti-inflammatory effects, with minimal side effects (3–6).

Chronic inflammation can be assessed by measurement of various inflammatory biomarkers, including inflammatory cytokines (interleukin [IL]-6, IL-1 $\beta$ , and tumor necrosis factor [TNF]- $\alpha$ ) and acute phase proteins (high-sensitivity C-reactive protein [hsCRP]) (7,8). The maximal capacity of peripheral blood leukocytes to produce inflammatory cytokines (mitogen-stimulated) has also been suggested as a possible indicator of inflammation (5). Previous research has shown that physically active individuals (regardless of gender) have a lower plasma inflammatory cytokine concentration, mitogen-stimulated inflammatory cytokines, and hsCRP (5–11). In a two recent studies from our laboratory (3,4), we demonstrated that older (65–80 years), physically active women had significantly less lipopolysaccharide (LPS)-stimulated inflammatory cytokine production than did older, sedentary women. Although the relationship between physical activity and inflammatory cytokines has been documented, the mechanism for the response has not been elucidated.

It was hypothesized that the Toll-like receptor 4 (TLR4) pathway may play a role in the anti-inflammatory effects of a physically active lifestyle (4). TLR4 modulates the pathway that allows cells to respond to in vitro LPS stimulation (12,13). In addition to the response to LPS, TLR4 signaling has been shown to be effected by heat shock proteins (HSP 60 and HSP 70) and alterations in mitogen-activated protein kinase (MAPK) activity (14). Cells with a high cell-surface expression of TLR4 produce significantly more inflammatory cytokine when stimulated with LPS (mitogen) than do cells with low TLR4 expression (12,13). In previous studies from our laboratory, we have found that TLR4 expression (messenger RNA and cell-surface) was lower in physically active older women compared to sedentary older women (3,4). These studies support a possible relationship between TLR4 and inflammatory cytokines, which might explain the anti-inflammatory effects attributed to a physically active lifestyle.

Aging has been associated with an accumulation of chronic inflammation (7,8). Our previous investigations have focused on older women (3,4) and have not included men or younger individuals. To our knowledge, no published studies have examined the effect of age and physical activity status in both men and women. We hypothesize that

Table 1. Participant Characteristics

| Characteristic                                              | Old, Active (N = 23) | Old, Inactive (N = 21) | Young, Active (N = 21) | Young, Inactive (N = 19) |
|-------------------------------------------------------------|----------------------|------------------------|------------------------|--------------------------|
| Age, y                                                      | 72 ± 5               | 69 ± 4                 | 24 ± 4.8               | 24 ± 5.1                 |
| Height, cm                                                  | 167.4 ± 8.1          | 168.9 ± 7.1            | 174.0 ± 12.2           | 171.7 ± 9.1              |
| Weight, kg                                                  | 68.9 ± 9.9           | 79.5 ± 15.7            | 70.6 ± 11.2            | 76.5 ± 16.0              |
| BMI, kg·m <sup>-2</sup> )                                   | 24.2 ± 2.7*          | 27.7 ± 4.2             | 23.3 ± 2.5*            | 25.9 ± 3.7               |
| Percent body fat                                            | 32.1 ± 7.2*          | 35.2 ± 7.9             | 17.3 ± 7.6*†           | 22.9 ± 5.6†              |
| VO <sub>2max</sub> , ml·kg <sup>-1</sup> ·min <sup>-1</sup> | 39.1 ± 8.0*          | 25.0 ± 5.8             | 47.9 ± 8.7*†           | 31.9 ± 7.3†              |
| Leukocyte count (×10 <sup>9</sup> ·L <sup>-1</sup> )        | 3.68 ± 1.38          | 3.95 ± 1.04            | 4.02 ± 1.48            | 4.64 ± 1.35              |
| Monocyte count (×10 <sup>9</sup> ·L <sup>-1</sup> )         | 0.15 ± 0.10          | 0.21 ± 0.18            | 0.17 ± 0.14            | 0.11 ± 0.05              |
| Estradiol, pg·mL <sup>-1</sup> ‡                            | 24.3 ± 10.9          | 22.1 ± 16.0            | 39.8 ± 21.1†           | 66.2 ± 22.0†             |
| Testosterone, pg·mL <sup>-1</sup> ‡                         | 4.30 ± 1.05          | 3.86 ± 2.10            | 4.95 ± 0.96            | 4.17 ± 0.91              |
| Daily physical activity, h·day <sup>-1</sup>                | 2.7 ± 0.8*           | 0.5 ± 0.6              | 2.7 ± 0.7*             | 0.4 ± 0.5                |

Notes: Values represent mean ± standard deviation.

\*Different than inactive groups ( $p < .05$ ).

†Different than old groups ( $p < .05$ ).

‡Estradiol analysis was only completed on female participants, testosterone analysis was only completed on male participants.

older participants will have greater LPS-stimulated inflammatory cytokine production, higher TLR4 expression, and more hsCRP than will younger participants. We further hypothesize that, independent of age; inactive participants will have greater LPS-stimulated inflammatory cytokine production, higher TLR4 expression, and more hsCRP than will active participants. The purpose of this study was to examine the association between physical age, physical activity status, and the degree of chronic inflammation as assessed by inflammatory cytokine production and plasma hsCRP. The association of age and physical activity status on CD14<sup>+</sup> cell-surface expression of TLR4 was also examined.

## METHODS

### Participants

All testing procedures were approved by the Committee for the Use of Human Subjects at Purdue University. Men and women were recruited to fill one of four groups: old (60–80 years) active lifestyle; old inactive lifestyle; young (18–30 years) active lifestyle; or young inactive lifestyle (Table 1). Participants were screened over the phone prior to a laboratory visit to estimate activity status and rule out any contraindications for the study. After the phone screening, participants reported to the Wastl Human Performance Laboratory and completed a university-approved informed consent, medical history, and a Paffenbarger Physical Activity Questionnaire (15). Participants with a known metabolic disorder (e.g., diabetes mellitus, elevated cholesterol), HIV or AIDS, an autoimmune disease (e.g., arthritis), and/or cardiovascular disease were excluded.

Additional exclusionary criteria included: major surgery in the past year, current or previous (last 12 months) tobacco use, more than a moderate intake of alcohol (>2 drinks per day), current or previous illicit drug use, current use of hormone replacements (e.g., hormone replacement therapy, oral contraceptives, or testosterone), current use of selective estrogen receptor modulators, current use of bis-phosphonate drugs, current use of prescription anti-inflammatory drugs, current use of drugs designed to alter blood cholesterol

(e.g., statins), 10% change in body weight over the previous 6 months, and/or a body mass index above 35 kg·m<sup>-2</sup>. Participants who consumed over-the-counter anti-inflammatory medications (e.g., ibuprofen, naproxen sodium) and/or aspirin were asked to discontinue its use 7 days prior to blood sampling to allow for washout.

Participants who cleared the initial screening completed a modified Balke submaximal exercise test on the treadmill to predict maximal oxygen consumption (VO<sub>2max</sub>, an indicator of fitness level; 16). Group assignments were determined by comparing the participant's VO<sub>2max</sub> and physical activity questionnaire scores. Inactive participants had a VO<sub>2max</sub> which was below average for their age group and a sedentary lifestyle. Active participants had a VO<sub>2max</sub> which was at least above average for their age group and an active lifestyle. If the Paffenbarger scale and estimated VO<sub>2max</sub> did not indicate the same status for a given participant, that participant was excluded from the study ( $n = 5$ ). Body composition was determined by bioelectrical impedance analysis (BIA; Omron, Bannockburn, IL). Participants cleared for this analysis were scheduled for a blood sampling trial.

### Presampling Control

Two days prior to the blood sampling day, participants reported to the laboratory and were given a eucaloric diet to consume the day (24 hours) prior to blood sampling that included three meals plus a snack. Standard mixed diets (50% carbohydrate, 15% protein, and 35% fat) were prepared for each participant by a registered dietician in the Department of Foods and Nutrition at Purdue University. The total energy content of the diet was determined using the Harris–Benedict equations for men and women, based on body weight, height, and age (17). According to the Harris–Benedict equation, different activity factors were incorporated for active (1.7–1.8) and inactive (1.6–1.7) participants. Participants were provided detailed instructions regarding consumption of the control diet and were asked not to exercise 72 hours prior to the blood collection. Blood sampling for all younger women was completed within 7 days after the onset of menses.

### Blood Sampling Day

Participants arrived at the laboratory between 6:00 AM and 8:00 AM following an overnight fast (>8 hours) and rested quietly in a seated position for 30 minutes prior to blood sampling. Venous blood samples were collected into evacuated tubes (Vacutainer; Becton-Dickenson, Franklin Lakes, NJ) by a trained technician using a butterfly needle. Vacutainer tubes were pretreated with EDTA (plasma and flow cytometry), sodium heparin (LPS stimulation), or a silica and gel (SST) clot activator (serum). Plasma and serum were separated from blood cells within 30 minutes of collection and stored at  $-80^{\circ}\text{C}$  prior to analysis for testosterone, estrogen, and hsCRP.

### Leukocyte Counts

An average of triplicate leukocyte counts was determined as described previously (3,4) using an automated method ( $Z^2$  Coulter Counter; Beckman-Coulter, Miami, FL). The intra- and inter-assay coefficients of variation were less than 5% for all analyses. Monocyte count was determined by multiplying percent monocyte (determined by primary flow cytometry gating) by total leukocyte count.

### Flow Cytometry

Immunocytometry analysis was performed as described previously (4,18). Briefly, aliquots (100  $\mu\text{l}$ ) of EDTA-treated whole blood were combined with two different monoclonal-fluorescent labeled antibody cocktails in the bottom of separate polystyrene  $12 \times 75$  mm tubes (Sarstedt, Newton, NC). In Tube 1, the blood was combined with: CD14-FITC (Beckman-Coulter) and TLR4-PE (eBioscience, San Diego, CA). Tube 2 was labeled with immunoglobulin G (IgG)-FITC (e-bioscience) and IgG-PE (eBioscience) to serve as negative controls. Following incubation in the dark (30 minutes), tubes were processed using an automated system (TQ-prep; Beckman-Coulter).

Primary gates were established for monocytes based on forward and  $90^{\circ}$  side scatter. Secondary gates were established for CD14 within the primary monocyte gate. TLR4 mean fluorescent intensity (MFI) was determined on CD14<sup>+</sup> cells. Negative regions were set daily using isotype control tubes. All sample analyses were completed on an FC500 flow cytometer equipped with a 488 nm air-cooled argon laser (Beckman-Coulter).

### In Vitro Cytokine Stimulation and Production

LPS-stimulated production of IL-6, IL-1 $\beta$ , and TNF- $\alpha$  was determined using a whole-blood technique described previously (3,4). Briefly, sodium heparin-treated whole blood was diluted (1:20 in RPMI 1640, supplemented with L-glutamine [2 mM] and penicillin [100 U $\cdot\text{mL}^{-1}$ ]/streptomycin [100  $\mu\text{g}\cdot\text{mL}^{-1}$ ]), transferred to separate wells of a 24-well microplate, combined with LPS from *Salmonella enteritidis* (final concentration: 25  $\mu\text{g}\cdot\text{mL}^{-1}$ ; Sigma-Aldrich, St. Louis, MO), and incubated in a  $37^{\circ}\text{C}$ , 5%  $\text{CO}_2$  environment for 24 hours. Final concentration of LPS was determined by a lot-specific titration curve which was completed prior to the study (data not shown). The dose of LPS selected was chosen to elicit maximal cytokine production.

Following incubation, cell-free supernatants were collected and frozen at  $-80^{\circ}\text{C}$  until analysis.

Culture supernatant was diluted 1:80 (IL-6), 1:40 (IL-1 $\beta$ ), and 1:10 (TNF- $\alpha$ ) with assay diluent (10% fetal bovine serum in phosphate-buffered saline) to determine LPS-stimulated cytokine concentrations using separate enzyme-linked immunosorbent assay (ELISA) sets (BD Biosciences, Franklin Lakes, NJ). Optimal supernatant dilution factor was determined previously in our laboratory (3,4). Coefficients of variation (intra- and inter-assay), established using an internal laboratory control, were less than 5% for all analyses. To minimize variation, all samples for a given analyte were analyzed on the same day.

### Plasma and Serum Analyses

EDTA-treated plasma was analyzed for total testosterone (male participants only) and estrogen (female participants only), and serum was analyzed for hsCRP using separate commercially available ELISA kits (Alpco Diagnostics, Windham, NH).

### Statistical Analyses

Prior to statistical testing, data were assessed to determine that assumptions for normality and constant variance were met using quantile-quantile and residual plots, respectively. All dependent variables were analyzed using a 2 (age: old and young)  $\times$  2 (physical activity status: active and inactive) analysis of variance (ANOVA) using PC-SPSS (version 12.0; Chicago, IL). Significance for all tests was set at  $p < .05$ . When significant interactions were detected, location of significance was determined using separate Student  $t$  tests with a Bonferroni correction for multiple comparisons. All dependent variables are presented as mean  $\pm$  standard error of the mean (*SEM*). Correlation analysis was completed on the key dependent variables in the present study to further explore the relationship between age, activity status, biomarkers of inflammation, and TLR4.

## RESULTS

### Leukocyte Counts

No significant differences were found for leukocyte or monocyte counts (Table 1).

### Flow Cytometry

No significant differences were found for CD14<sup>+</sup> count (Figure 1A). A significant main effect for physical activity status was found for TLR4 ( $F = 10.722$ ,  $p = .002$ ; Figure 1B), where inactive was 32% greater than active.

### In Vitro Cytokine Stimulation and Production

A significant main effect for physical activity status was also found for LPS-stimulated IL-6 production ( $F = 10.139$ ,  $p = .002$ ; Figure 2A), where inactive was 24% greater than active. A significant Age  $\times$  Physical Activity Status interaction was found for LPS-stimulated IL-1 $\beta$  ( $F = 5.380$ ,  $p = .023$ , Figure 2B). Young-active was 44% higher than old-active, and old-inactive was 14% higher than young-active. Finally, a significant main effect for physical activity

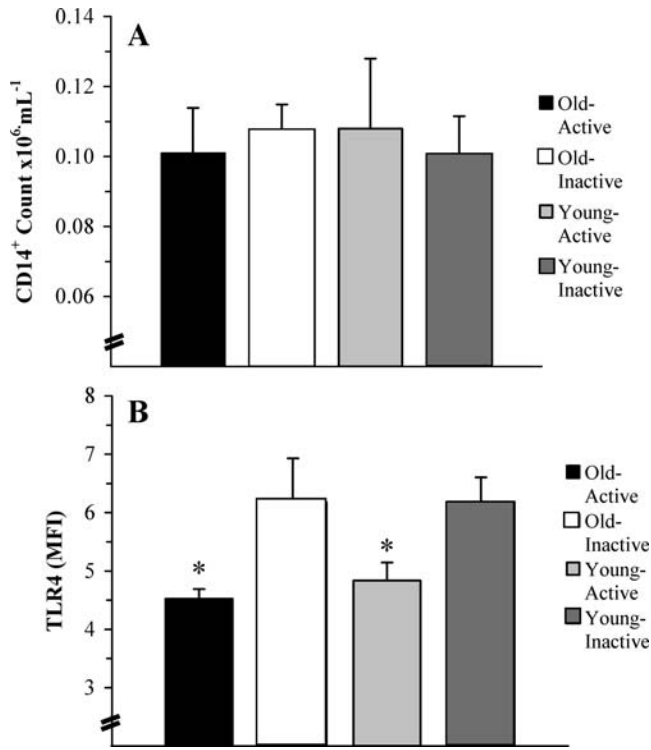

Figure 1. Two-color flow cytometry was used to determine CD14+ cell count (A) and CD14+ mean fluorescence intensity (MFI) for cell-surface expression of Toll-like receptor 4 (TLR4; B). \*Main effect for activity status (pooled effect regardless of age) indicates less than inactive ( $p < .05$ ).

status was found for LPS-stimulated TNF- $\alpha$  production ( $F = 6.039, p = .016$ ; Figure 2C), where inactive was 21% higher than active.

*Plasma and Serum Analyses*

No significant effects were found for plasma testosterone (male participants only, Table 1). A significant main effect for age was found for plasma estradiol (female participants only,  $F = 5.437, p = .029$ ; Table 1), where young participants had 44% more estradiol than old participants had. Significant main effects for age ( $F = 8.809, p = .004$ ) and physical activity status ( $F = 5.942, p = .017$ ) were found for serum hsCRP (Figure 3). Specifically, old participants had 53% higher hsCRP than did young participants, and active participants had 60% lower hsCRP than did inactive participants.

*Correlation Analysis*

Correlations were completed to compare the nature of the association between physical age, inflammatory biomarkers, and TLR4 by dividing the participants based on activity status (i.e., active vs inactive). For active participants, we found that age was significantly correlated to hsCRP (0.361,  $p = .022$ ), LPS-stimulated IL-6 production ( $-0.327, p = .032$ ), and LPS-stimulated IL-1 $\beta$  production ( $-0.374, p = .013$ ). Similar correlation trends existed for inactive participants; however, they were not significant. Correlations were also completed with all participants in a single analysis. These analyses revealed that daily physical activity

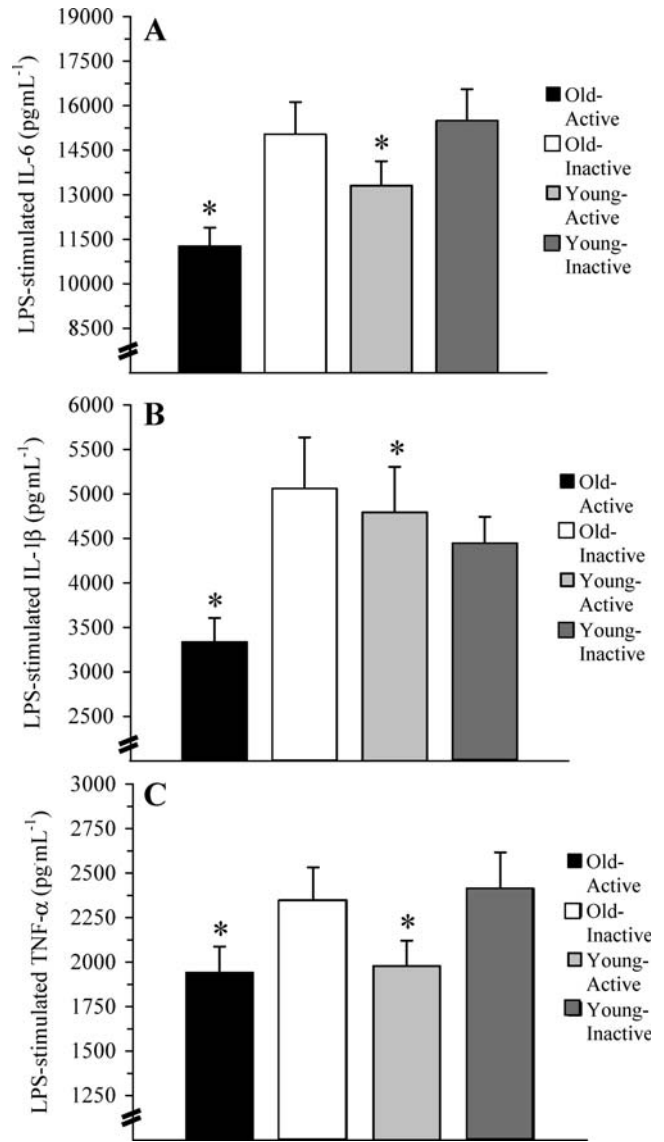

Figure 2. Lipopolysaccharide (LPS)-stimulated inflammatory cytokine production was determined by an in vitro, whole-blood culture (diluted 1:20 in RPMI 1640). Subsequent cell-free supernatants were analyzed for interleukin (IL)-6 (A), IL-1 $\beta$  (B), and tumor necrosis factor (TNF)- $\alpha$  (C) production. \*Main effect for activity status (pooled effect regardless of age) indicates less than inactive ( $p < .05$ ).

was significantly correlated to LPS-stimulated IL-6 production ( $-0.279, p = .011$ ), LPS-stimulated IL-1 $\beta$  production ( $-0.232, p = .036$ ), and TLR4 cell-surface expression ( $-0.234, p = .035$ ). The nature of these negative correlations suggests that as daily physical activity increases, LPS-stimulated IL-6, LPS-stimulated IL-1 $\beta$ , and TLR4 decrease.

**DISCUSSION**

The key findings of this investigation were that physically inactive participants had higher CD14 cell-surface expression of TLR4 and higher LPS-stimulated inflammatory cyto-

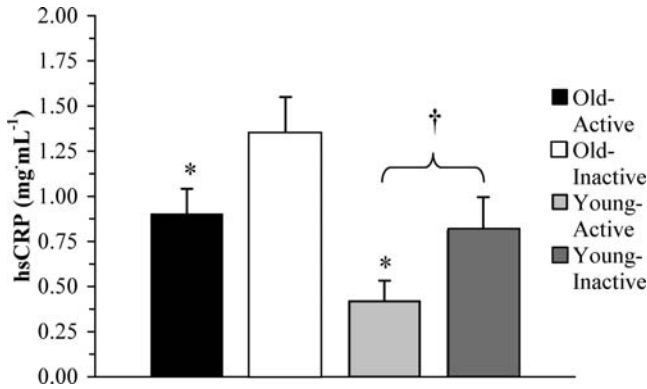

Figure 3. Serum high-sensitivity C-reactive protein (hsCRP) measured by enzyme-linked immunosorbent assay. Significant main effects were found for age and physical activity level. \*Main effect for activity status (pooled effect regardless of age) indicates less than inactive ( $p < .05$ ); †less than old ( $p < .05$ ). No significant interaction was found between age and physical activity level.

kine production than did physically active participants. These findings are consistent with previous reports from our laboratory (3,4) with respect to TLR4 and LPS-stimulated inflammatory cytokine production. Also, hsCRP was significantly higher in older (main effect) and inactive (main effect) participants, suggesting that age and physical activity status were associated with markers of chronic inflammation in our participant population.

We found that physically active individuals had a significantly lower hsCRP concentration than did physically inactive individuals. This finding supports previous reports by others which link hsCRP to physical activity (6,7). In accordance with our original hypothesis, we also found that older participants had a significantly higher hsCRP concentration than did younger participants. To our knowledge, this is the first study that examined the association between both age and physical activity status on hsCRP in the same study. Previous research has examined either old or young participants, but had not compared the two under similar, controlled conditions. Our findings with respect to hsCRP support previous reports that advancing age influences chronic inflammation (19) and that a physically active lifestyle may exert anti-inflammatory effects (3,4). Another interesting finding was that the hsCRP concentration of old-active participants was similar to that of young-inactive participants, which suggests that aging may alter the dynamics of acute phase proteins.

Our present study supports previous reports touting the anti-inflammatory effects of a physically active lifestyle (5); however, age did not alter LPS-stimulated inflammatory cytokine production. This finding was somewhat surprising because, in the same group of participants, we found that older participants had higher hsCRP levels than did younger participants. Inflammatory cytokine production is determined following *in vitro* stimulation with LPS, and hsCRP is measured as circulating concentration, thus it is possible that each measures a different aspect of inflammation. Based on the literature, it is not known which variable provides the most accurate representation of inflammatory status.

We demonstrated that physically active participants (regardless of age) had less cell-surface TLR4 expression than did physically inactive participants; however, we did not find a significant association with age. Also, we found that TLR4 expression was positively correlated to LPS-stimulated inflammatory cytokine production. These findings are consistent with previous reports from our laboratory and others (3,4,12,13). Also, TLR4 expression mirrored the inflammatory cytokine production response, where physical activity status, but not age, was associated with the response. The lack of age association may suggest that TLR4 expression is mediated by a mechanism similar to that of inflammatory cytokine production and is not directly related to hsCRP. More research is needed to fully evaluate the potential association between hsCRP and TLR4.

The key purpose of this study was to examine the association between various inflammatory biomarkers and TLR4 in individuals of different age and activity status. We selected an array of inflammatory markers which were assessed from various tissue sources (i.e., plasma, serum, and whole blood) which may complicate the comparison of the responses. We acknowledge that it may be difficult to fully compare all of the markers measured due to differences in measurement technique and the physiological source of the biomarkers.

### Conclusion

The key findings of the present study were that physically active participants had significantly lower hsCRP levels, inflammatory cytokine production, and cell-surface TLR4 expression than did physically inactive participants. Quantity of daily physical activity was also negatively correlated to LPS-stimulated cytokine production (IL-6 and IL-1 $\beta$ ) and TLR4. The findings of the present study support the hypothesis that regular physical activity elicits anti-inflammatory effects, which may lower chronic inflammation. In addition, the fact that the response of hsCRP, inflammatory cytokine production, and TLR4 expression differed suggests that they may be regulated by different mechanisms. Additional research is needed to identify and evaluate which exercise-mediated mechanisms regulate biomarkers associated with chronic inflammation.

### ACKNOWLEDGMENTS

This study was funded by grant IRO3 AG022185-01 from the National Institutes of Health/National Institute on Aging.

We thank Nadine Carnell, MS, RD, for developing the controlled diet menus and Janet Green for preparation of the meals.

Address correspondence to Brian K. McFarlin, PhD, University of Houston, Department of Health and Human Performance, 3855 Holman St., Houston, TX 77204. E-mail: bmcfarlin@uh.edu

### REFERENCES

- Bermudez EA, Rifai N, Buring J, Manson JE, Ridker PM. Interrelationships among circulating interleukin-6, C-reactive protein, and traditional cardiovascular risk factors in women. *Arterioscler Thromb Vasc Biol.* 2002;22:1668–1673.
- Scheidt-Nave C, Bismar H, Leidig-Bruckner G, et al. Serum interleukin 6 is a major predictor of bone loss in women specific to the first decade past menopause. *J Clin Endocrinol Metab.* 2001;86:2032–2042.

3. Flynn MG, McFarlin BK, Phillips MD, Stewart LK, Timmerman KL. Toll-like receptor 4 and CD14 mRNA expression are lower in resistive exercise trained, elderly women. *J Appl Physiol*. 2003;95:1833–1842.
4. McFarlin BK, Flynn MG, Campbell WW, Stewart LK, Timmerman KL. TLR4 is lower in resistance-trained older women and related to inflammatory cytokines. *Med Sci Sports Exerc*. 2004;36:1876–1883.
5. Smith JK, Dykes R, Douglas JE, Krishnaswamy G, Berk S. Long-term exercise and atherogenic activity of blood mononuclear cells in persons at risk of developing ischemic heart disease. *JAMA*. 1999;281:1722–1727.
6. Taaffe DR, Harris TB, Ferrucci L, Rowe J, Seeman TE. Cross-sectional and prospective relationships of interleukin-6 and C-reactive protein with physical performance in elderly persons: MacArthur studies of successful aging. *J Gerontol Med Sci*. 2000;55A:M709–M715.
7. Cesari M, Penninx BS, Pahor M, et al. Inflammatory markers and physical performance in older persons: the InCHIANTI study. *J Gerontol Biol Sci Med Sci*. 2004;59A:242–248.
8. Pedersen BK, Bruunsgaard H, Ostrowski K, et al. Cytokines in aging and exercise. *Int J Sports Med*. 2000;21 Suppl 1:S4–S9.
9. Reuben DB, Judd-Hamilton L, Harris TB, Seeman TE. The associations between physical activity and inflammatory markers in high-functioning older persons: MacArthur Studies of Successful Aging. *J Am Geriatr Soc*. 2003;51:1125–1130.
10. Gielen S, Adams V, Mobius-Winkler S, et al. Anti-inflammatory effects of exercise training in the skeletal muscle of patients with chronic heart failure. *J Am Coll Cardiol*. 2003;42:861–868.
11. Greiwe JS, Cheng B, Rubin DC, Yarasheski KE, Semenkovich CF. Resistance exercise decreases skeletal muscle tumor necrosis factor alpha in frail elderly humans. *FASEB J*. 2001;15:475–482.
12. Kalis C, Kanzler B, Lembo A, Poltorak A, Galanos C, Freudenberg MA. Toll-like receptor 4 expression levels determine the degree of LPS-susceptibility in mice. *Eur J Immunol*. 2003;33:798–805.
13. Wang PL, Oido-Mori M, Fujii T, et al. Heterogeneous expression of Toll-like receptor 4 and downregulation of Toll-like receptor 4 expression on human gingival fibroblasts by *Porphyromonas gingivalis* lipopolysaccharide. *Biochem Biophys Res Commun*. 2001;288:863–867.
14. Cohen-Sfady M, Nussbaum G, Pevsner-Fischer M, et al. Heat shock protein 60 activates B cells via the TLR4-MyD88 pathway. *J Immunol*. 2005;175:3594–3602.
15. Paffenbarger RS Jr, Blair SN, Lee IM, Hyde RT. Measurement of physical activity to assess health effects in free-living populations. *Med Sci Sports Exerc*. 1993;25:60–70.
16. American College of Sports Medicine, Whaley MH, Brubaker PH, Otto RM, Armstrong LE. *ACSM's Guidelines for Exercise Testing and Prescription*. 7th ed. Baltimore, MD: Lippincott Williams & Wilkins; 2005.
17. Harris JA, Benedict FG. A biometric study of basal metabolism in man. 1919; Carnegie Institute of Washington Publication No. 279.
18. McFarlin BK, Flynn MG, Stewart LK, Timmerman KL. Carbohydrate intake during endurance exercise increases natural killer cell responsiveness to IL-2. *J Appl Physiol*. 2004;96:271–275.
19. McGeer PL, McGeer EG. Inflammation and the degenerative diseases of aging. *Ann N Y Acad Sci*. 2004;1035:104–116.

Received July 27, 2005

Accepted December 1, 2005

Decision Editor: Luigi Ferrucci, MD, PhD

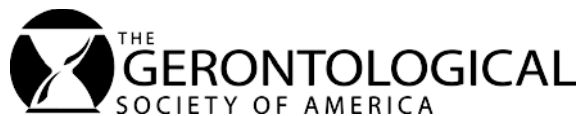

### JUST RELEASED!

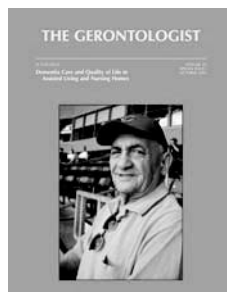

"Dementia Care and Quality of Life in Assisted Living and Nursing Homes"

A special issue of  
*The Gerontologist*

Guest Edited by  
Richard Schulz, PhD

"Health Inequalities Across the Life Course"

A special issue of  
*The Journal of Gerontology: Social Sciences*

Guest Edited by  
Steven H. Zarit, PhD and  
Leonard I. Pearlin, PhD

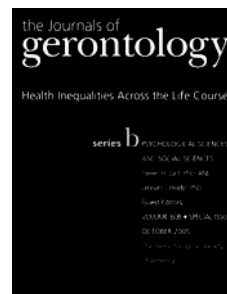

Price: \$20 each, available at [www.geron.org](http://www.geron.org)
